# Supplementary material
Source: PubMed Central journal article supplement (PMC6775876)
Supplement: rccm.201809-1755OC_cahill_data_supplement.pdf [file rccm.201809-1755OC_cahill_data_supplement.pdf]

**Title: Unique Effect of Aspirin Therapy on Biomarkers in Aspirin-Exacerbated Respiratory Disease: A Prospective Trial**

**Authors:** <sup>1</sup>Katherine N. Cahill, M.D., <sup>2,5</sup>Jing Cui, M.D., Ph.D., <sup>2,5</sup>Parul Kothari, M.D., <sup>2</sup>Katherine Murphy, <sup>3-5</sup>Benjamin A. Raby, M.D., <sup>2</sup>Joseph Singer, <sup>2,3,5</sup>Elliot Israel, M.D., <sup>2,5</sup>Joshua A. Boyce, M.D., and <sup>2,5</sup>Tanya M. Laidlaw, M.D.

ONLINE DATA SUPPLEMENT

**Supplemental Table E1.** Change in urinary eicosanoids and correlation with change in clinical outcomes.

|                  | Change in Urinary Eicosanoid |         |          |         |          |         |
|------------------|------------------------------|---------|----------|---------|----------|---------|
|                  | LTE <sub>4</sub>             |         | PGD-M    |         | PGE-M    |         |
| Clinical Outcome | <i>r</i>                     | p-value | <i>r</i> | p-value | <i>r</i> | p-value |
| TNSS             | 0.114                        | 0.489   | -0.020   | 0.904   | -0.121   | 0.456   |
| ACQ-7            | 0.259                        | 0.111   | 0.193    | 0.245   | 0.124    | 0.448   |
| FEV1% predicted  | -0.136                       | 0.410   | -0.230   | 0.165   | -0.090   | 0.800   |
| FeNO             | 0.136                        | 0.408   | 0.191    | 0.252   | 0.177    | 0.615   |

Pearson correlation coefficient reported. TNSS – total nasal symptom score, ACQ-7 – asthma control questionnaire 7, FEV1% - forced expiratory volume in 1 second, FeNO – fraction exhaled nitric oxide.

|                          | Baseline    |                          |                                 |                                         |
|--------------------------|-------------|--------------------------|---------------------------------|-----------------------------------------|
|                          | ATA         | AERD<br>All <sup>#</sup> | AERD<br>Normal Eos <sup>#</sup> | AERD subjects<br>with paired<br>samples |
| <b>n</b>                 | 10          | 25                       | 19                              | 15                                      |
| <b>Age (years)</b>       | 39.5 ± 17   | 48 ± 8.3                 | 48.3 ± 8.6                      | 48.9 ± 7.4                              |
| <b>Male (n, %)</b>       | 4 (40%)     | 9 (36%)                  | 7 (37%)                         | 6 (40%)                                 |
| <b>Race (n, %)</b>       |             |                          |                                 |                                         |
| <b>White</b>             | 8 (80%)     | 24 (96%)                 | 19 (100%)                       | 15 (100%)                               |
| <b>Black/AA</b>          | 2 (20%)     | 1 (4%)                   | 0                               | 0                                       |
| <b>Absolute eos</b>      |             |                          |                                 |                                         |
| <b>Baseline</b>          | 0.24 ± 0.12 | 0.34 ± 0.26              | 0.22 ± 0.1                      | 0.34 ± 0.28                             |
| <b>High-dose aspirin</b> | --          | --                       | --                              | 1.1 ± 1.11*                             |

**Supplemental Table E2.** Population characteristics for RNA-sequencing analysis

\* Comparison of absolute eosinophil counts at baseline versus on high-dose aspirin in 14 subjects with aspirin exacerbated respiratory disease (AERD) on whom CBCs with differential were available (paired t-test p-value = 0.023)

# Comparisons made with subjects with aspirin-tolerant asthma (ATA)

Eos - eosinophils

**Supplemental Table E3.** Genes differentially expressed with high dose aspirin treatment in subjects with AERD for whom RNA-sequencing was available at baseline and on aspirin (adjusted p-value < 0.05).

| HGNC Symbol | Ensembl ID      | Average Expression | Log 2 Fold Change | Standard Error Log 2 Fold Change | Wald Statistic | P Value  | Adjusted P Value |
|-------------|-----------------|--------------------|-------------------|----------------------------------|----------------|----------|------------------|
| CLU         | ENSG00000120885 | 71.25              | 1.04              | 0.20                             | 5.15           | 2.65E-07 | 0.00232          |
| GIMAP1      | ENSG00000213203 | 40.26              | -1.08             | 0.21                             | -5.10          | 3.45E-07 | 0.00232          |
| NIPSNAP3A   | ENSG00000136783 | 115.06             | 0.67              | 0.14                             | 4.89           | 9.87E-07 | 0.00444          |
| PDLIM1      | ENSG00000107438 | 199.46             | 1.00              | 0.21                             | 4.79           | 1.67E-06 | 0.00446          |
| HRK         | ENSG00000135116 | 98.63              | 1.18              | 0.25                             | 4.79           | 1.69E-06 | 0.00446          |
| NA          | ENSG00000229023 | 56.35              | -0.75             | 0.16                             | -4.74          | 2.11E-06 | 0.00446          |
| THYN1       | ENSG00000151500 | 152.79             | 0.68              | 0.14                             | 4.72           | 2.32E-06 | 0.00446          |
| OAS2        | ENSG00000111335 | 412.91             | -0.92             | 0.20                             | -4.70          | 2.64E-06 | 0.00446          |
| MZT2A       | ENSG00000173272 | 23.79              | 0.99              | 0.22                             | 4.58           | 4.63E-06 | 0.00632          |
| COMMD7      | ENSG00000149600 | 117.28             | 0.66              | 0.14                             | 4.58           | 4.68E-06 | 0.00632          |
| VLDLR       | ENSG00000147852 | 173.33             | 0.95              | 0.21                             | 4.53           | 5.82E-06 | 0.00656          |
| ANXA1       | ENSG00000135046 | 4938.37            | 0.75              | 0.16                             | 4.53           | 5.83E-06 | 0.00656          |
| NTAN1       | ENSG00000157045 | 262.97             | 0.64              | 0.14                             | 4.50           | 6.81E-06 | 0.00663          |
| PQLC3       | ENSG00000162976 | 167.24             | 0.59              | 0.13                             | 4.50           | 6.88E-06 | 0.00663          |
| ADH5        | ENSG00000197894 | 196.42             | 0.59              | 0.13                             | 4.48           | 7.37E-06 | 0.00663          |
| CDC14B      | ENSG00000081377 | 105.70             | 0.71              | 0.16                             | 4.47           | 8.00E-06 | 0.00674          |
| CD52        | ENSG00000169442 | 1162.76            | 0.78              | 0.18                             | 4.40           | 1.09E-05 | 0.00755          |
| CD24        | ENSG00000272398 | 1064.45            | 0.90              | 0.20                             | 4.39           | 1.12E-05 | 0.00755          |
| PIN1        | ENSG00000127445 | 95.59              | 0.56              | 0.13                             | 4.39           | 1.13E-05 | 0.00755          |
| LINC00299   | ENSG00000236790 | 162.23             | 0.89              | 0.20                             | 4.39           | 1.15E-05 | 0.00755          |
| NA          | ENSG00000259418 | 45.98              | 0.74              | 0.17                             | 4.38           | 1.18E-05 | 0.00755          |
| NA          | ENSG00000267416 | 42.57              | 1.12              | 0.26                             | 4.36           | 1.27E-05 | 0.00755          |

|         |                 |         |       |      |       |          |         |
|---------|-----------------|---------|-------|------|-------|----------|---------|
| TBC1D4  | ENSG00000136111 | 83.20   | -0.99 | 0.23 | -4.36 | 1.31E-05 | 0.00755 |
| STAC    | ENSG00000144681 | 50.27   | 1.26  | 0.29 | 4.35  | 1.34E-05 | 0.00755 |
| NA      | ENSG00000254614 | 29.15   | 0.71  | 0.16 | 4.34  | 1.41E-05 | 0.00759 |
| SEPW1   | ENSG00000178980 | 114.77  | 0.75  | 0.17 | 4.32  | 1.58E-05 | 0.00818 |
| CD244   | ENSG00000122223 | 397.51  | 0.81  | 0.19 | 4.29  | 1.80E-05 | 0.00843 |
| AGBL5   | ENSG00000084693 | 38.32   | 0.66  | 0.15 | 4.29  | 1.81E-05 | 0.00843 |
| PIM1    | ENSG00000137193 | 1496.52 | 0.62  | 0.15 | 4.29  | 1.83E-05 | 0.00843 |
| RHOBTB3 | ENSG00000164292 | 396.47  | 0.88  | 0.21 | 4.28  | 1.89E-05 | 0.00843 |
| NA      | ENSG00000261026 | 643.98  | -0.85 | 0.20 | -4.27 | 1.94E-05 | 0.00843 |
| LPAR6   | ENSG00000139679 | 91.90   | -0.91 | 0.21 | -4.26 | 2.02E-05 | 0.00852 |
| FBN1    | ENSG00000166147 | 282.66  | 0.95  | 0.22 | 4.25  | 2.18E-05 | 0.00875 |
| GDAP1   | ENSG00000104381 | 33.34   | 0.82  | 0.19 | 4.24  | 2.21E-05 | 0.00875 |
| CDK2AP1 | ENSG00000111328 | 116.88  | 0.82  | 0.19 | 4.23  | 2.33E-05 | 0.00896 |
| MTFR1L  | ENSG00000117640 | 293.29  | 0.71  | 0.17 | 4.22  | 2.48E-05 | 0.00912 |
| GALNT12 | ENSG00000119514 | 47.04   | 0.84  | 0.20 | 4.20  | 2.68E-05 | 0.00912 |
| FAM110B | ENSG00000169122 | 80.36   | 0.63  | 0.15 | 4.20  | 2.71E-05 | 0.00912 |
| PKIA    | ENSG00000171033 | 17.85   | -0.97 | 0.23 | -4.19 | 2.74E-05 | 0.00912 |
| GOLIM4  | ENSG00000173905 | 213.99  | 0.81  | 0.19 | 4.19  | 2.81E-05 | 0.00912 |
| SRI     | ENSG00000075142 | 511.57  | 0.57  | 0.14 | 4.19  | 2.82E-05 | 0.00912 |
| GRHL1   | ENSG00000134317 | 87.10   | 0.96  | 0.23 | 4.19  | 2.84E-05 | 0.00912 |
| PLEKHA7 | ENSG00000166689 | 35.80   | 0.99  | 0.24 | 4.17  | 2.98E-05 | 0.00935 |
| KCNA3   | ENSG00000177272 | 58.54   | -0.87 | 0.21 | -4.17 | 3.05E-05 | 0.00936 |
| IGFBP7  | ENSG00000163453 | 84.93   | 0.71  | 0.17 | 4.16  | 3.17E-05 | 0.00943 |
| CDCA7L  | ENSG00000164649 | 144.77  | 0.60  | 0.14 | 4.16  | 3.22E-05 | 0.00943 |
| SOCS6   | ENSG00000170677 | 48.54   | 0.76  | 0.18 | 4.15  | 3.36E-05 | 0.00964 |
| NEK3    | ENSG00000136098 | 33.67   | 0.78  | 0.19 | 4.14  | 3.54E-05 | 0.00994 |
| SYNJ2BP | ENSG00000213463 | 39.48   | -0.91 | 0.22 | -4.11 | 3.87E-05 | 0.01066 |
| BCL2    | ENSG00000171791 | 217.36  | -0.85 | 0.21 | -4.09 | 4.40E-05 | 0.01186 |

|           |                 |         |       |      |       |          |         |
|-----------|-----------------|---------|-------|------|-------|----------|---------|
| EEF2K     | ENSG00000103319 | 421.07  | 0.94  | 0.23 | 4.05  | 5.17E-05 | 0.01367 |
| NA        | ENSG00000224550 | 19.95   | 0.74  | 0.18 | 4.03  | 5.56E-05 | 0.01426 |
| C9orf40   | ENSG00000135045 | 38.58   | 0.64  | 0.16 | 4.03  | 5.61E-05 | 0.01426 |
| RAB4A     | ENSG00000168118 | 163.94  | 0.61  | 0.15 | 4.02  | 5.79E-05 | 0.01426 |
| M6PR      | ENSG00000003056 | 565.63  | 0.46  | 0.11 | 4.02  | 5.82E-05 | 0.01426 |
| CYP7B1    | ENSG00000172817 | 41.03   | 0.99  | 0.25 | 4.01  | 6.00E-05 | 0.01446 |
| LRP12     | ENSG00000147650 | 50.14   | 0.89  | 0.22 | 4.01  | 6.12E-05 | 0.01447 |
| ORMDL3    | ENSG00000172057 | 281.11  | 0.58  | 0.14 | 4.00  | 6.27E-05 | 0.01455 |
| CAT       | ENSG00000121691 | 7306.36 | 0.73  | 0.18 | 4.00  | 6.39E-05 | 0.01455 |
| CYP4V2    | ENSG00000145476 | 46.93   | -0.69 | 0.17 | -3.99 | 6.47E-05 | 0.01455 |
| ENTPD5    | ENSG00000187097 | 138.81  | 0.81  | 0.20 | 3.97  | 7.23E-05 | 0.01550 |
| SOCS2     | ENSG00000120833 | 178.38  | 0.92  | 0.23 | 3.97  | 7.23E-05 | 0.01550 |
| GIPR      | ENSG00000010310 | 36.81   | 0.88  | 0.22 | 3.97  | 7.24E-05 | 0.01550 |
| INPP5B    | ENSG00000204084 | 623.41  | 0.65  | 0.16 | 3.96  | 7.38E-05 | 0.01552 |
| CISD2     | ENSG00000145354 | 94.86   | 0.56  | 0.14 | 3.96  | 7.48E-05 | 0.01552 |
| ITGA6     | ENSG00000091409 | 1292.47 | 0.67  | 0.17 | 3.96  | 7.65E-05 | 0.01556 |
| TEX30     | ENSG00000151287 | 126.84  | 0.80  | 0.20 | 3.95  | 7.74E-05 | 0.01556 |
| MIAT      | ENSG00000225783 | 667.18  | 0.80  | 0.20 | 3.95  | 7.85E-05 | 0.01556 |
| SEPT11    | ENSG00000138758 | 416.88  | 0.81  | 0.20 | 3.94  | 8.29E-05 | 0.01597 |
| INPP4B    | ENSG00000109452 | 182.06  | -0.94 | 0.24 | -3.93 | 8.34E-05 | 0.01597 |
| TP53TG1   | ENSG00000182165 | 20.96   | 0.86  | 0.22 | 3.93  | 8.48E-05 | 0.01597 |
| TEC       | ENSG00000135605 | 487.91  | 0.88  | 0.22 | 3.93  | 8.53E-05 | 0.01597 |
| TMED3     | ENSG00000166557 | 144.58  | 0.75  | 0.19 | 3.92  | 8.89E-05 | 0.01636 |
| CAMK4     | ENSG00000152495 | 150.89  | -0.93 | 0.24 | -3.92 | 8.98E-05 | 0.01636 |
| C1orf174  | ENSG00000198912 | 123.94  | 0.40  | 0.10 | 3.89  | 9.92E-05 | 0.01768 |
| C10orf128 | ENSG00000204161 | 794.09  | 0.80  | 0.21 | 3.89  | 1.01E-04 | 0.01768 |
| ZNF823    | ENSG00000197933 | 78.62   | 0.84  | 0.22 | 3.89  | 1.01E-04 | 0.01768 |
| RNASE2    | ENSG00000169385 | 437.28  | 1.03  | 0.27 | 3.88  | 1.04E-04 | 0.01775 |

|          |                 |         |       |      |       |          |         |
|----------|-----------------|---------|-------|------|-------|----------|---------|
| DBI      | ENSG00000155368 | 319.67  | 0.48  | 0.12 | 3.88  | 1.06E-04 | 0.01775 |
| PARL     | ENSG00000175193 | 141.05  | 0.41  | 0.11 | 3.88  | 1.06E-04 | 0.01775 |
| CD28     | ENSG00000178562 | 101.82  | -0.93 | 0.24 | -3.87 | 1.07E-04 | 0.01775 |
| GIMAP2   | ENSG00000106560 | 181.90  | -0.72 | 0.19 | -3.87 | 1.08E-04 | 0.01775 |
| PYROXD2  | ENSG00000119943 | 124.70  | 0.83  | 0.21 | 3.87  | 1.09E-04 | 0.01778 |
| ADGRG6   | ENSG00000112414 | 14.43   | 1.06  | 0.28 | 3.86  | 1.13E-04 | 0.01789 |
| HDAC1    | ENSG00000116478 | 589.86  | 0.36  | 0.09 | 3.86  | 1.14E-04 | 0.01789 |
| ANKRD55  | ENSG00000164512 | 87.66   | 0.66  | 0.17 | 3.86  | 1.14E-04 | 0.01789 |
| CD9      | ENSG00000010278 | 588.13  | 0.84  | 0.22 | 3.85  | 1.18E-04 | 0.01802 |
| SUSD1    | ENSG00000106868 | 452.84  | 0.68  | 0.18 | 3.85  | 1.18E-04 | 0.01802 |
| NA       | ENSG00000228363 | 49.72   | 0.74  | 0.19 | 3.85  | 1.19E-04 | 0.01802 |
| S100A10  | ENSG00000197747 | 242.99  | 0.67  | 0.17 | 3.84  | 1.21E-04 | 0.01802 |
| SORD     | ENSG00000140263 | 365.12  | 0.80  | 0.21 | 3.84  | 1.23E-04 | 0.01802 |
| NDFIP2   | ENSG00000102471 | 127.82  | 0.88  | 0.23 | 3.84  | 1.23E-04 | 0.01802 |
| SCRN1    | ENSG00000136193 | 220.80  | 0.65  | 0.17 | 3.83  | 1.29E-04 | 0.01850 |
| RNASE3   | ENSG00000169397 | 57.72   | 0.85  | 0.22 | 3.82  | 1.32E-04 | 0.01850 |
| MSRB3    | ENSG00000174099 | 153.29  | 0.52  | 0.14 | 3.82  | 1.34E-04 | 0.01850 |
| ESYT1    | ENSG00000139641 | 1527.28 | 0.81  | 0.21 | 3.82  | 1.35E-04 | 0.01850 |
| CCL23    | ENSG00000274736 | 89.15   | 1.07  | 0.28 | 3.82  | 1.36E-04 | 0.01850 |
| NA       | ENSG00000279957 | 88.20   | -0.74 | 0.19 | -3.82 | 1.36E-04 | 0.01850 |
| SERPINB6 | ENSG00000124570 | 148.76  | 0.55  | 0.14 | 3.81  | 1.37E-04 | 0.01850 |
| ZNF597   | ENSG00000167981 | 185.90  | 0.70  | 0.18 | 3.81  | 1.37E-04 | 0.01850 |
| GCNT4    | ENSG00000176928 | 36.34   | -0.92 | 0.24 | -3.81 | 1.41E-04 | 0.01882 |
| ENC1     | ENSG00000171617 | 314.21  | 0.72  | 0.19 | 3.80  | 1.44E-04 | 0.01907 |
| TFF3     | ENSG00000160180 | 19.25   | 1.04  | 0.27 | 3.80  | 1.47E-04 | 0.01919 |
| ACSM3    | ENSG00000005187 | 319.79  | 0.88  | 0.23 | 3.79  | 1.48E-04 | 0.01919 |
| INO80C   | ENSG00000153391 | 42.55   | 0.58  | 0.15 | 3.79  | 1.51E-04 | 0.01938 |
| RDH11    | ENSG00000072042 | 163.99  | 0.53  | 0.14 | 3.78  | 1.56E-04 | 0.01980 |

|          |                 |          |       |      |       |          |         |
|----------|-----------------|----------|-------|------|-------|----------|---------|
| TRPC6    | ENSG00000137672 | 180.38   | 0.88  | 0.23 | 3.78  | 1.58E-04 | 0.01988 |
| ADORA3   | ENSG00000282608 | 189.54   | 0.92  | 0.24 | 3.78  | 1.59E-04 | 0.01988 |
| APOL6    | ENSG00000221963 | 1940.48  | -0.68 | 0.18 | -3.77 | 1.63E-04 | 0.02022 |
| SLC24A3  | ENSG00000185052 | 92.56    | 0.84  | 0.22 | 3.76  | 1.69E-04 | 0.02075 |
| SYNE1    | ENSG00000131018 | 20249.04 | 0.80  | 0.21 | 3.76  | 1.73E-04 | 0.02082 |
| NA       | ENSG00000259834 | 60.80    | -0.87 | 0.23 | -3.75 | 1.79E-04 | 0.02082 |
| PKP2     | ENSG00000057294 | 69.72    | 0.90  | 0.24 | 3.74  | 1.82E-04 | 0.02082 |
| NA       | ENSG00000259374 | 34.51    | -0.82 | 0.22 | -3.74 | 1.82E-04 | 0.02082 |
| LEF1     | ENSG00000138795 | 190.83   | -0.88 | 0.23 | -3.74 | 1.82E-04 | 0.02082 |
| FLNB     | ENSG00000136068 | 621.64   | 0.87  | 0.23 | 3.74  | 1.82E-04 | 0.02082 |
| SYCP2L   | ENSG00000153157 | 30.50    | 0.96  | 0.26 | 3.74  | 1.83E-04 | 0.02082 |
| GALNT10  | ENSG00000164574 | 596.65   | 0.54  | 0.14 | 3.74  | 1.84E-04 | 0.02082 |
| LAIR1    | ENSG00000167613 | 367.34   | 0.69  | 0.19 | 3.74  | 1.84E-04 | 0.02082 |
| MYO5C    | ENSG00000128833 | 18.70    | -0.75 | 0.20 | -3.73 | 1.92E-04 | 0.02148 |
| SNORA38B | ENSG00000200394 | 42.71    | 0.69  | 0.18 | 3.73  | 1.94E-04 | 0.02148 |
| ARHGAP10 | ENSG00000071205 | 277.65   | 0.85  | 0.23 | 3.73  | 1.94E-04 | 0.02148 |
| C11orf21 | ENSG00000110665 | 490.84   | 0.48  | 0.13 | 3.72  | 1.96E-04 | 0.02148 |
| SFMBT2   | ENSG00000198879 | 597.12   | 0.81  | 0.22 | 3.72  | 2.00E-04 | 0.02174 |
| PDE4D    | ENSG00000113448 | 1469.51  | 0.66  | 0.18 | 3.72  | 2.02E-04 | 0.02184 |
| NA       | ENSG00000273015 | 135.59   | 0.63  | 0.17 | 3.71  | 2.06E-04 | 0.02203 |
| DPP4     | ENSG00000197635 | 60.27    | -0.90 | 0.24 | -3.71 | 2.08E-04 | 0.02208 |
| NA       | ENSG00000234290 | 679.08   | -0.71 | 0.19 | -3.71 | 2.11E-04 | 0.02208 |
| IL7R     | ENSG00000168685 | 977.98   | -0.86 | 0.23 | -3.70 | 2.11E-04 | 0.02208 |
| ZFP36    | ENSG00000128016 | 10908.12 | -0.68 | 0.18 | -3.70 | 2.13E-04 | 0.02208 |
| FUCA1    | ENSG00000179163 | 150.97   | 0.60  | 0.16 | 3.70  | 2.17E-04 | 0.02223 |
| BHLHE40  | ENSG00000134107 | 2089.05  | 0.69  | 0.19 | 3.70  | 2.18E-04 | 0.02223 |
| GSTM4    | ENSG00000168765 | 109.29   | 0.83  | 0.22 | 3.69  | 2.26E-04 | 0.02285 |
| ANKRD18A | ENSG00000180071 | 87.26    | 0.74  | 0.20 | 3.69  | 2.27E-04 | 0.02285 |



|          |                 |        |       |      |       |          |         |
|----------|-----------------|--------|-------|------|-------|----------|---------|
| LRP6     | ENSG0000070018  | 14.57  | -0.80 | 0.22 | -3.68 | 2.30E-04 | 0.02285 |
| LONRF2   | ENSG00000170500 | 14.17  | 0.97  | 0.26 | 3.68  | 2.30E-04 | 0.02285 |
| SLC16A7  | ENSG00000118596 | 116.39 | -0.70 | 0.19 | -3.68 | 2.34E-04 | 0.02293 |
| ACSF2    | ENSG00000167107 | 111.70 | 0.80  | 0.22 | 3.68  | 2.35E-04 | 0.02293 |
| SLC6A12  | ENSG00000111181 | 14.34  | -0.77 | 0.21 | -3.68 | 2.36E-04 | 0.02293 |
| CEP85    | ENSG00000130695 | 208.76 | 0.72  | 0.20 | 3.67  | 2.39E-04 | 0.02300 |
| ICOS     | ENSG00000163600 | 39.84  | -0.94 | 0.26 | -3.67 | 2.46E-04 | 0.02354 |
| NA       | ENSG00000270019 | 80.45  | -0.81 | 0.22 | -3.66 | 2.55E-04 | 0.02404 |
| TNNT1    | ENSG00000105048 | 33.40  | 0.97  | 0.27 | 3.66  | 2.56E-04 | 0.02404 |
| RASSF1   | ENSG00000068028 | 315.20 | 0.52  | 0.14 | 3.65  | 2.59E-04 | 0.02404 |
| AGA      | ENSG00000038002 | 81.21  | 0.51  | 0.14 | 3.65  | 2.60E-04 | 0.02404 |
| CMAHP    | ENSG00000168405 | 335.92 | 0.75  | 0.21 | 3.65  | 2.63E-04 | 0.02404 |
| ABCB10   | ENSG00000135776 | 234.17 | 0.67  | 0.18 | 3.65  | 2.63E-04 | 0.02404 |
| TTC7B    | ENSG00000165914 | 231.18 | 0.84  | 0.23 | 3.65  | 2.64E-04 | 0.02404 |
| WFDC21P  | ENSG00000261040 | 9.53   | 0.99  | 0.27 | 3.65  | 2.66E-04 | 0.02405 |
| PAPSS1   | ENSG00000138801 | 936.08 | 0.69  | 0.19 | 3.64  | 2.71E-04 | 0.02412 |
| PTGS1    | ENSG00000095303 | 306.51 | 0.59  | 0.16 | 3.64  | 2.72E-04 | 0.02412 |
| C1orf228 | ENSG00000198520 | 51.73  | 0.72  | 0.20 | 3.64  | 2.72E-04 | 0.02412 |
| CDK15    | ENSG00000138395 | 48.89  | 0.92  | 0.25 | 3.64  | 2.75E-04 | 0.02412 |
| MCCC1    | ENSG00000078070 | 118.48 | 0.63  | 0.17 | 3.64  | 2.76E-04 | 0.02412 |
| CDKN2C   | ENSG00000123080 | 26.94  | 0.65  | 0.18 | 3.63  | 2.79E-04 | 0.02412 |
| TRAT1    | ENSG00000163519 | 69.55  | -0.92 | 0.25 | -3.63 | 2.79E-04 | 0.02412 |
| ADI1     | ENSG00000182551 | 280.59 | 0.55  | 0.15 | 3.63  | 2.84E-04 | 0.02441 |
| CSRP1    | ENSG00000159176 | 228.55 | 0.68  | 0.19 | 3.63  | 2.88E-04 | 0.02457 |
| SLC4A10  | ENSG00000144290 | 21.88  | -0.96 | 0.26 | -3.62 | 2.93E-04 | 0.02483 |
| TMEM140  | ENSG00000146859 | 728.22 | -0.52 | 0.14 | -3.62 | 2.99E-04 | 0.02518 |
| NA       | ENSG00000253736 | 27.28  | -0.75 | 0.21 | -3.61 | 3.01E-04 | 0.02518 |
| OAS3     | ENSG00000111331 | 758.41 | -0.77 | 0.21 | -3.61 | 3.05E-04 | 0.02539 |

|           |                 |         |       |      |       |          |         |
|-----------|-----------------|---------|-------|------|-------|----------|---------|
| P2RY6     | ENSG00000171631 | 9.33    | 0.93  | 0.26 | 3.61  | 3.09E-04 | 0.02539 |
| TRNAU1AP  | ENSG00000180098 | 85.57   | 0.45  | 0.12 | 3.61  | 3.09E-04 | 0.02539 |
| HIST2H2BC | ENSG00000203819 | 18.65   | -0.75 | 0.21 | -3.61 | 3.11E-04 | 0.02539 |
| ASRGL1    | ENSG00000162174 | 131.79  | 0.82  | 0.23 | 3.60  | 3.14E-04 | 0.02551 |
| SERPING1  | ENSG00000149131 | 99.38   | -0.86 | 0.24 | -3.60 | 3.16E-04 | 0.02551 |
| SNTB1     | ENSG00000172164 | 598.83  | 0.65  | 0.18 | 3.60  | 3.18E-04 | 0.02551 |
| TXNRD3    | ENSG00000197763 | 9.51    | 0.88  | 0.25 | 3.60  | 3.21E-04 | 0.02559 |
| LSM4      | ENSG00000130520 | 57.91   | 0.57  | 0.16 | 3.59  | 3.25E-04 | 0.02559 |
| TFCP2L1   | ENSG00000115112 | 21.38   | 0.92  | 0.26 | 3.59  | 3.27E-04 | 0.02559 |
| CAMK2D    | ENSG00000145349 | 109.61  | -0.78 | 0.22 | -3.59 | 3.27E-04 | 0.02559 |
| CCR3      | ENSG00000183625 | 1366.98 | 0.76  | 0.21 | 3.59  | 3.29E-04 | 0.02559 |
| TMEM14C   | ENSG00000111843 | 95.83   | 0.59  | 0.16 | 3.59  | 3.30E-04 | 0.02559 |
| ENPEP     | ENSG00000138792 | 21.47   | 0.86  | 0.24 | 3.59  | 3.37E-04 | 0.02589 |
| SKP2      | ENSG00000145604 | 108.00  | 0.64  | 0.18 | 3.58  | 3.38E-04 | 0.02589 |
| NUDT17    | ENSG00000186364 | 23.36   | 0.78  | 0.22 | 3.58  | 3.44E-04 | 0.02616 |
| NA        | ENSG00000207034 | 88.98   | -0.56 | 0.16 | -3.58 | 3.45E-04 | 0.02616 |
| ADGRE1    | ENSG00000174837 | 2433.53 | 0.86  | 0.24 | 3.57  | 3.52E-04 | 0.02649 |
| SLFN13    | ENSG00000154760 | 501.30  | 0.70  | 0.20 | 3.57  | 3.57E-04 | 0.02675 |
| CORO2A    | ENSG00000106789 | 204.05  | 0.64  | 0.18 | 3.57  | 3.61E-04 | 0.02686 |
| LRIG1     | ENSG00000144749 | 147.13  | 0.67  | 0.19 | 3.57  | 3.63E-04 | 0.02686 |
| NA        | ENSG00000279608 | 138.09  | -0.48 | 0.13 | -3.56 | 3.68E-04 | 0.02709 |
| KLF12     | ENSG00000118922 | 290.59  | -0.79 | 0.22 | -3.56 | 3.78E-04 | 0.02770 |
| ERMP1     | ENSG00000099219 | 205.94  | 0.65  | 0.18 | 3.55  | 3.84E-04 | 0.02799 |
| DENND2C   | ENSG00000175984 | 44.48   | 0.70  | 0.20 | 3.54  | 4.05E-04 | 0.02939 |
| LINC01146 | ENSG00000258867 | 41.16   | 0.64  | 0.18 | 3.53  | 4.13E-04 | 0.02980 |
| NA        | ENSG00000232680 | 29.76   | -0.72 | 0.20 | -3.52 | 4.25E-04 | 0.03047 |
| ZNF792    | ENSG00000180884 | 123.84  | 0.61  | 0.17 | 3.52  | 4.36E-04 | 0.03080 |
| ACSL6     | ENSG00000164398 | 16.84   | -0.88 | 0.25 | -3.52 | 4.38E-04 | 0.03080 |

|          |                 |         |       |      |       |          |         |
|----------|-----------------|---------|-------|------|-------|----------|---------|
| SIAH2    | ENSG00000181788 | 386.44  | 0.49  | 0.14 | 3.52  | 4.38E-04 | 0.03080 |
| BTLA     | ENSG00000186265 | 50.02   | -0.78 | 0.22 | -3.51 | 4.40E-04 | 0.03080 |
| CTSO     | ENSG00000256043 | 44.89   | -0.61 | 0.17 | -3.51 | 4.41E-04 | 0.03080 |
| WSB2     | ENSG00000176871 | 314.78  | 0.43  | 0.12 | 3.51  | 4.47E-04 | 0.03107 |
| ARHGAP5  | ENSG00000100852 | 241.03  | -0.66 | 0.19 | -3.51 | 4.51E-04 | 0.03107 |
| SNX17    | ENSG00000115234 | 265.41  | 0.43  | 0.12 | 3.51  | 4.52E-04 | 0.03107 |
| ITGB7    | ENSG00000139626 | 391.40  | 0.71  | 0.20 | 3.50  | 4.58E-04 | 0.03118 |
| DOCK9    | ENSG00000088387 | 113.68  | -0.72 | 0.21 | -3.50 | 4.58E-04 | 0.03118 |
| SCPEP1   | ENSG00000121064 | 754.59  | 0.50  | 0.14 | 3.50  | 4.62E-04 | 0.03124 |
| NAT6     | ENSG00000243477 | 39.27   | 0.75  | 0.21 | 3.50  | 4.63E-04 | 0.03124 |
| SAMHD1   | ENSG00000101347 | 1176.83 | -0.59 | 0.17 | -3.50 | 4.70E-04 | 0.03136 |
| DHCR24   | ENSG00000116133 | 15.43   | 0.81  | 0.23 | 3.50  | 4.70E-04 | 0.03136 |
| SLC4A8   | ENSG00000050438 | 193.30  | 0.79  | 0.23 | 3.50  | 4.73E-04 | 0.03137 |
| KHDRBS3  | ENSG00000131773 | 25.98   | 0.83  | 0.24 | 3.49  | 4.75E-04 | 0.03137 |
| DOK2     | ENSG00000147443 | 272.72  | 0.72  | 0.21 | 3.49  | 4.88E-04 | 0.03208 |
| CD101    | ENSG00000134256 | 596.94  | 0.83  | 0.24 | 3.49  | 4.91E-04 | 0.03215 |
| BRI3BP   | ENSG00000184992 | 571.57  | 0.68  | 0.20 | 3.48  | 4.99E-04 | 0.03242 |
| ZFP28    | ENSG00000196867 | 32.50   | 0.62  | 0.18 | 3.48  | 5.00E-04 | 0.03242 |
| PXMP4    | ENSG00000101417 | 32.66   | 0.66  | 0.19 | 3.48  | 5.03E-04 | 0.03244 |
| ATP6V0A2 | ENSG00000185344 | 623.20  | 0.56  | 0.16 | 3.47  | 5.15E-04 | 0.03307 |
| ATP8B2   | ENSG00000143515 | 510.29  | 0.60  | 0.17 | 3.46  | 5.38E-04 | 0.03417 |
| ZMYND11  | ENSG00000015171 | 421.29  | 0.59  | 0.17 | 3.46  | 5.38E-04 | 0.03417 |
| SCP2     | ENSG00000116171 | 339.77  | 0.44  | 0.13 | 3.46  | 5.40E-04 | 0.03417 |
| TFDP2    | ENSG00000114126 | 352.61  | 0.49  | 0.14 | 3.45  | 5.51E-04 | 0.03458 |
| NR3C2    | ENSG00000151623 | 58.29   | -0.76 | 0.22 | -3.45 | 5.51E-04 | 0.03458 |
| GALNT6   | ENSG00000139629 | 224.82  | 0.77  | 0.22 | 3.45  | 5.56E-04 | 0.03470 |
| CTNS     | ENSG00000040531 | 65.61   | 0.63  | 0.18 | 3.45  | 5.59E-04 | 0.03471 |
| RNF144A  | ENSG00000151692 | 450.64  | 0.66  | 0.19 | 3.45  | 5.61E-04 | 0.03471 |

|         |                 |         |       |      |       |          |         |
|---------|-----------------|---------|-------|------|-------|----------|---------|
| STARD4  | ENSG00000164211 | 311.92  | 0.76  | 0.22 | 3.45  | 5.64E-04 | 0.03472 |
| KLHDC10 | ENSG00000128607 | 256.05  | 0.36  | 0.10 | 3.45  | 5.68E-04 | 0.03480 |
| PCTP    | ENSG00000141179 | 355.39  | 0.43  | 0.12 | 3.44  | 5.71E-04 | 0.03483 |
| ALS2    | ENSG00000003393 | 393.85  | 0.58  | 0.17 | 3.44  | 5.73E-04 | 0.03483 |
| CISH    | ENSG00000114737 | 53.52   | 0.57  | 0.17 | 3.44  | 5.83E-04 | 0.03516 |
| PIK3R3  | ENSG00000117461 | 47.85   | 0.82  | 0.24 | 3.44  | 5.86E-04 | 0.03516 |
| NA      | ENSG00000280228 | 31.63   | -0.86 | 0.25 | -3.44 | 5.87E-04 | 0.03516 |
| CENPV   | ENSG00000166582 | 41.20   | 0.76  | 0.22 | 3.43  | 5.93E-04 | 0.03526 |
| PLD4    | ENSG00000166428 | 67.56   | 0.82  | 0.24 | 3.43  | 5.96E-04 | 0.03526 |
| GSTM2   | ENSG00000213366 | 109.30  | 0.80  | 0.23 | 3.43  | 5.96E-04 | 0.03526 |
| IER2    | ENSG00000160888 | 3190.73 | -0.64 | 0.19 | -3.43 | 6.01E-04 | 0.03536 |
| KLHL6   | ENSG00000172578 | 754.37  | 0.57  | 0.17 | 3.43  | 6.04E-04 | 0.03543 |
| FAM124B | ENSG00000124019 | 68.87   | 0.83  | 0.24 | 3.43  | 6.12E-04 | 0.03567 |
| ACCS    | ENSG00000110455 | 194.04  | 0.73  | 0.21 | 3.43  | 6.14E-04 | 0.03567 |
| GBP4    | ENSG00000162654 | 490.77  | -0.70 | 0.20 | -3.42 | 6.20E-04 | 0.03582 |
| TMEM50B | ENSG00000142188 | 290.41  | 0.58  | 0.17 | 3.42  | 6.22E-04 | 0.03582 |
| NA      | ENSG00000254281 | 245.26  | -0.83 | 0.24 | -3.42 | 6.33E-04 | 0.03618 |
| GPI     | ENSG00000105220 | 474.35  | 0.78  | 0.23 | 3.42  | 6.34E-04 | 0.03618 |
| CNR2    | ENSG00000188822 | 500.61  | 0.76  | 0.22 | 3.42  | 6.36E-04 | 0.03618 |
| KLF2    | ENSG00000127528 | 2043.14 | -0.55 | 0.16 | -3.41 | 6.50E-04 | 0.03656 |
| TSC22D1 | ENSG00000102804 | 169.37  | 0.42  | 0.12 | 3.41  | 6.51E-04 | 0.03656 |
| MAML2   | ENSG00000184384 | 482.22  | -0.64 | 0.19 | -3.41 | 6.53E-04 | 0.03656 |
| MYCT1   | ENSG00000120279 | 86.71   | 0.81  | 0.24 | 3.41  | 6.54E-04 | 0.03656 |
| GPR137B | ENSG00000077585 | 123.29  | 0.80  | 0.23 | 3.41  | 6.60E-04 | 0.03656 |
| NDUFA4  | ENSG00000189043 | 267.94  | 0.50  | 0.15 | 3.41  | 6.60E-04 | 0.03656 |
| POLR2L  | ENSG00000177700 | 23.84   | 0.65  | 0.19 | 3.40  | 6.63E-04 | 0.03656 |
| NBPF11  | ENSG00000263956 | 67.39   | 0.61  | 0.18 | 3.40  | 6.65E-04 | 0.03656 |
| PAFAH2  | ENSG00000158006 | 197.58  | 0.62  | 0.18 | 3.40  | 6.67E-04 | 0.03656 |

|          |                 |         |       |      |       |          |         |
|----------|-----------------|---------|-------|------|-------|----------|---------|
| ITM2C    | ENSG00000135916 | 179.84  | 0.81  | 0.24 | 3.40  | 6.78E-04 | 0.03659 |
| NA       | ENSG00000223960 | 9.48    | -0.81 | 0.24 | -3.40 | 6.80E-04 | 0.03659 |
| HS3ST3B1 | ENSG00000125430 | 59.14   | -0.71 | 0.21 | -3.40 | 6.85E-04 | 0.03659 |
| ZNF34    | ENSG00000196378 | 38.13   | 0.64  | 0.19 | 3.40  | 6.85E-04 | 0.03659 |
| OBFC1    | ENSG00000107960 | 273.90  | 0.40  | 0.12 | 3.39  | 6.88E-04 | 0.03659 |
| TFEC     | ENSG00000105967 | 71.55   | -0.73 | 0.22 | -3.39 | 6.92E-04 | 0.03659 |
| PDGFD    | ENSG00000170962 | 101.80  | 0.56  | 0.17 | 3.39  | 6.92E-04 | 0.03659 |
| TRABD2A  | ENSG00000186854 | 86.23   | -0.80 | 0.24 | -3.39 | 6.93E-04 | 0.03659 |
| NA       | ENSG00000272941 | 131.91  | -0.54 | 0.16 | -3.39 | 6.94E-04 | 0.03659 |
| KIFAP3   | ENSG00000075945 | 184.06  | 0.53  | 0.16 | 3.39  | 6.95E-04 | 0.03659 |
| FIBP     | ENSG00000172500 | 65.78   | 0.50  | 0.15 | 3.39  | 6.97E-04 | 0.03659 |
| MFHAS1   | ENSG00000147324 | 54.74   | -0.66 | 0.20 | -3.39 | 7.02E-04 | 0.03671 |
| HSPD1P11 | ENSG00000251348 | 23.29   | 0.89  | 0.26 | 3.39  | 7.10E-04 | 0.03698 |
| GFOD1    | ENSG00000145990 | 766.67  | 0.73  | 0.22 | 3.38  | 7.17E-04 | 0.03700 |
| NA       | ENSG00000225339 | 23.84   | 0.65  | 0.19 | 3.38  | 7.17E-04 | 0.03700 |
| TMEM181  | ENSG00000146433 | 462.66  | 0.56  | 0.17 | 3.38  | 7.19E-04 | 0.03700 |
| EGR1     | ENSG00000120738 | 2242.99 | -0.77 | 0.23 | -3.38 | 7.22E-04 | 0.03700 |
| KDSR     | ENSG00000119537 | 44.28   | -0.64 | 0.19 | -3.38 | 7.30E-04 | 0.03726 |
| SMYD2    | ENSG00000143499 | 113.70  | 0.52  | 0.15 | 3.38  | 7.34E-04 | 0.03733 |
| LMLN     | ENSG00000185621 | 22.28   | 0.68  | 0.20 | 3.37  | 7.45E-04 | 0.03778 |
| TNIK     | ENSG00000154310 | 507.12  | 0.68  | 0.20 | 3.37  | 7.51E-04 | 0.03794 |
| SNX5     | ENSG00000089006 | 308.94  | 0.59  | 0.18 | 3.37  | 7.55E-04 | 0.03801 |
| SEMA3C   | ENSG00000075223 | 121.89  | -0.57 | 0.17 | -3.37 | 7.64E-04 | 0.03829 |
| CD3G     | ENSG00000160654 | 95.92   | -0.80 | 0.24 | -3.36 | 7.76E-04 | 0.03874 |
| MAP4K5   | ENSG00000012983 | 553.89  | 0.65  | 0.19 | 3.36  | 7.80E-04 | 0.03878 |
| OAS1     | ENSG00000089127 | 282.55  | -0.67 | 0.20 | -3.36 | 7.82E-04 | 0.03878 |
| BCL7C    | ENSG00000099385 | 34.25   | 0.63  | 0.19 | 3.36  | 7.86E-04 | 0.03881 |
| APOL3    | ENSG00000128284 | 88.77   | -0.76 | 0.23 | -3.36 | 7.92E-04 | 0.03898 |

|           |                 |          |       |      |       |          |         |
|-----------|-----------------|----------|-------|------|-------|----------|---------|
| AGFG2     | ENSG00000106351 | 37.83    | 0.70  | 0.21 | 3.35  | 8.12E-04 | 0.03972 |
| SPINT2    | ENSG00000167642 | 149.02   | 0.58  | 0.17 | 3.35  | 8.13E-04 | 0.03972 |
| NA        | ENSG00000214797 | 12.92    | -0.77 | 0.23 | -3.34 | 8.23E-04 | 0.04009 |
| IKZF2     | ENSG00000030419 | 1604.88  | 0.69  | 0.21 | 3.34  | 8.31E-04 | 0.04023 |
| FAM69A    | ENSG00000154511 | 17.50    | -0.79 | 0.24 | -3.34 | 8.32E-04 | 0.04023 |
| ANKRD33B  | ENSG00000164236 | 305.86   | 0.72  | 0.21 | 3.34  | 8.42E-04 | 0.04056 |
| NA        | ENSG00000251002 | 82.65    | 0.63  | 0.19 | 3.34  | 8.45E-04 | 0.04056 |
| RAB29     | ENSG00000117280 | 298.80   | 0.40  | 0.12 | 3.34  | 8.49E-04 | 0.04059 |
| LRRRC8C   | ENSG00000171488 | 135.39   | -0.71 | 0.21 | -3.33 | 8.59E-04 | 0.04091 |
| SLC2A8    | ENSG00000136856 | 10.12    | 0.84  | 0.25 | 3.33  | 8.65E-04 | 0.04091 |
| SNORA65   | ENSG00000201302 | 33.70    | 0.56  | 0.17 | 3.33  | 8.65E-04 | 0.04091 |
| DAAM2     | ENSG00000146122 | 84.10    | -0.72 | 0.22 | -3.33 | 8.75E-04 | 0.04124 |
| BTN2A2    | ENSG00000124508 | 153.01   | -0.50 | 0.15 | -3.33 | 8.79E-04 | 0.04129 |
| CCDC149   | ENSG00000181982 | 34.57    | -0.65 | 0.19 | -3.32 | 8.85E-04 | 0.04132 |
| HES6      | ENSG00000144485 | 12.04    | 0.83  | 0.25 | 3.32  | 8.86E-04 | 0.04132 |
| ACTR8     | ENSG00000113812 | 179.10   | 0.35  | 0.11 | 3.32  | 8.92E-04 | 0.04146 |
| SFXN1     | ENSG00000164466 | 191.22   | 0.55  | 0.16 | 3.32  | 8.95E-04 | 0.04146 |
| NA        | ENSG00000276568 | 13.59    | 0.84  | 0.25 | 3.32  | 8.99E-04 | 0.04146 |
| GBP1      | ENSG00000117228 | 1751.69  | -0.70 | 0.21 | -3.32 | 9.01E-04 | 0.04146 |
| STAT1     | ENSG00000115415 | 4670.78  | -0.53 | 0.16 | -3.32 | 9.16E-04 | 0.04200 |
| DUSP1     | ENSG00000120129 | 40402.89 | -0.61 | 0.18 | -3.31 | 9.22E-04 | 0.04214 |
| GPRIN3    | ENSG00000185477 | 209.01   | -0.68 | 0.21 | -3.31 | 9.36E-04 | 0.04225 |
| CDK8      | ENSG00000132964 | 112.53   | 0.37  | 0.11 | 3.31  | 9.37E-04 | 0.04225 |
| LINC00539 | ENSG00000224429 | 21.48    | 0.80  | 0.24 | 3.31  | 9.39E-04 | 0.04225 |
| IAH1      | ENSG00000134330 | 100.97   | 0.40  | 0.12 | 3.31  | 9.41E-04 | 0.04225 |
| THBS4     | ENSG00000113296 | 64.28    | 0.85  | 0.26 | 3.31  | 9.42E-04 | 0.04225 |
| UBE2Q2    | ENSG00000140367 | 289.09   | 0.46  | 0.14 | 3.31  | 9.43E-04 | 0.04225 |
| L2HGDH    | ENSG00000087299 | 28.79    | 0.76  | 0.23 | 3.30  | 9.55E-04 | 0.04265 |

|           |                 |          |       |      |       |          |         |
|-----------|-----------------|----------|-------|------|-------|----------|---------|
| NIPAL2    | ENSG00000104361 | 157.82   | 0.71  | 0.21 | 3.30  | 9.62E-04 | 0.04272 |
| WEE1      | ENSG00000166483 | 118.28   | 0.67  | 0.20 | 3.30  | 9.63E-04 | 0.04272 |
| CYP4F12   | ENSG00000186204 | 150.99   | 0.66  | 0.20 | 3.30  | 9.72E-04 | 0.04286 |
| FAM110A   | ENSG00000125898 | 74.31    | 0.61  | 0.18 | 3.30  | 9.73E-04 | 0.04286 |
| ARHGAP18  | ENSG00000146376 | 250.18   | 0.50  | 0.15 | 3.30  | 9.81E-04 | 0.04307 |
| SPATA9    | ENSG00000145757 | 21.29    | 0.87  | 0.26 | 3.30  | 9.84E-04 | 0.04307 |
| VIPAS39   | ENSG00000151445 | 153.39   | 0.33  | 0.10 | 3.29  | 9.96E-04 | 0.04346 |
| ANKRD6    | ENSG00000135299 | 133.41   | 0.47  | 0.14 | 3.29  | 1.00E-03 | 0.04365 |
| DMAP1     | ENSG00000178028 | 92.37    | 0.40  | 0.12 | 3.29  | 1.01E-03 | 0.04372 |
| BTBD19    | ENSG00000222009 | 175.71   | -0.74 | 0.23 | -3.29 | 1.02E-03 | 0.04392 |
| PTGS2     | ENSG00000073756 | 49864.25 | -0.75 | 0.23 | -3.29 | 1.02E-03 | 0.04392 |
| CHST12    | ENSG00000136213 | 92.35    | 0.72  | 0.22 | 3.28  | 1.03E-03 | 0.04404 |
| ALDH6A1   | ENSG00000119711 | 274.89   | 0.72  | 0.22 | 3.28  | 1.03E-03 | 0.04411 |
| NA        | ENSG00000254826 | 152.12   | -0.52 | 0.16 | -3.28 | 1.04E-03 | 0.04412 |
| RASGRF2   | ENSG00000113319 | 53.15    | -0.79 | 0.24 | -3.28 | 1.04E-03 | 0.04412 |
| TULP4     | ENSG00000130338 | 106.35   | -0.57 | 0.18 | -3.28 | 1.04E-03 | 0.04430 |
| SLC18A2   | ENSG00000165646 | 49.35    | 0.66  | 0.20 | 3.28  | 1.05E-03 | 0.04437 |
| RN7SL368P | ENSG00000239948 | 573.07   | -0.67 | 0.20 | -3.27 | 1.06E-03 | 0.04475 |
| TSHZ2     | ENSG00000182463 | 14.51    | -0.83 | 0.25 | -3.27 | 1.07E-03 | 0.04482 |
| CS        | ENSG00000062485 | 867.71   | 0.58  | 0.18 | 3.27  | 1.07E-03 | 0.04487 |
| CLINT1    | ENSG00000113282 | 1407.73  | 0.53  | 0.16 | 3.27  | 1.07E-03 | 0.04487 |
| PMP22     | ENSG00000109099 | 218.78   | 0.93  | 0.28 | 3.27  | 1.08E-03 | 0.04489 |
| LPIN1     | ENSG00000134324 | 263.46   | 0.62  | 0.19 | 3.27  | 1.09E-03 | 0.04492 |
| LINC00426 | ENSG00000238121 | 43.71    | 0.69  | 0.21 | 3.27  | 1.09E-03 | 0.04492 |
| AFG3L1P   | ENSG00000223959 | 83.26    | 0.46  | 0.14 | 3.26  | 1.10E-03 | 0.04492 |
| MAP9      | ENSG00000164114 | 13.16    | -0.87 | 0.27 | -3.26 | 1.10E-03 | 0.04492 |
| POLR3C    | ENSG00000186141 | 116.54   | 0.43  | 0.13 | 3.26  | 1.10E-03 | 0.04492 |
| ELMOD3    | ENSG00000115459 | 104.48   | 0.34  | 0.10 | 3.26  | 1.10E-03 | 0.04492 |

|           |                 |         |       |      |       |          |         |
|-----------|-----------------|---------|-------|------|-------|----------|---------|
| FMNL3     | ENSG00000161791 | 278.48  | 0.61  | 0.19 | 3.26  | 1.11E-03 | 0.04492 |
| LINC01366 | ENSG00000235172 | 105.74  | -0.76 | 0.23 | -3.26 | 1.11E-03 | 0.04492 |
| LINC00861 | ENSG00000245164 | 76.22   | -0.74 | 0.23 | -3.26 | 1.11E-03 | 0.04492 |
| HDAC9     | ENSG00000048052 | 114.02  | -0.63 | 0.19 | -3.26 | 1.11E-03 | 0.04492 |
| PLA2G4A   | ENSG00000116711 | 139.06  | 0.65  | 0.20 | 3.26  | 1.12E-03 | 0.04498 |
| CHRM3-AS2 | ENSG00000233355 | 161.02  | 0.70  | 0.22 | 3.25  | 1.14E-03 | 0.04571 |
| MYB       | ENSG00000118513 | 177.26  | 0.56  | 0.17 | 3.25  | 1.15E-03 | 0.04617 |
| INPP1     | ENSG00000151689 | 148.25  | 0.67  | 0.21 | 3.25  | 1.16E-03 | 0.04617 |
| NUP85     | ENSG00000125450 | 107.47  | 0.38  | 0.12 | 3.25  | 1.16E-03 | 0.04617 |
| ZSCAN9    | ENSG00000137185 | 80.65   | 0.54  | 0.17 | 3.25  | 1.17E-03 | 0.04630 |
| ALDH3A2   | ENSG00000072210 | 146.32  | 0.54  | 0.17 | 3.24  | 1.18E-03 | 0.04630 |
| IFIH1     | ENSG00000115267 | 639.74  | -0.60 | 0.18 | -3.24 | 1.18E-03 | 0.04630 |
| MCPH1     | ENSG00000147316 | 320.22  | 0.58  | 0.18 | 3.24  | 1.18E-03 | 0.04630 |
| SLC35D1   | ENSG00000116704 | 312.74  | 0.62  | 0.19 | 3.24  | 1.18E-03 | 0.04630 |
| HILPDA    | ENSG00000135245 | 19.07   | 0.63  | 0.20 | 3.24  | 1.19E-03 | 0.04648 |
| CA8       | ENSG00000178538 | 29.88   | 0.70  | 0.22 | 3.24  | 1.20E-03 | 0.04682 |
| PRKAB2    | ENSG00000131791 | 160.51  | 0.55  | 0.17 | 3.24  | 1.21E-03 | 0.04683 |
| TM7SF3    | ENSG00000064115 | 243.19  | 0.41  | 0.13 | 3.24  | 1.21E-03 | 0.04683 |
| ZSCAN29   | ENSG00000140265 | 495.40  | 0.54  | 0.17 | 3.23  | 1.22E-03 | 0.04683 |
| RPS6KA2   | ENSG00000071242 | 171.00  | 0.77  | 0.24 | 3.23  | 1.22E-03 | 0.04683 |
| PPOX      | ENSG00000143224 | 28.58   | 0.62  | 0.19 | 3.23  | 1.22E-03 | 0.04683 |
| P2RY14    | ENSG00000174944 | 1058.94 | 0.69  | 0.21 | 3.23  | 1.23E-03 | 0.04683 |
| NUP93     | ENSG00000102900 | 327.28  | 0.57  | 0.18 | 3.23  | 1.23E-03 | 0.04683 |
| IL15      | ENSG00000164136 | 27.77   | -0.71 | 0.22 | -3.23 | 1.23E-03 | 0.04683 |
| CYSLTR2   | ENSG00000152207 | 1365.04 | 0.78  | 0.24 | 3.23  | 1.24E-03 | 0.04692 |
| CNKSR3    | ENSG00000153721 | 43.07   | 0.86  | 0.27 | 3.23  | 1.24E-03 | 0.04692 |
| FAM136A   | ENSG00000035141 | 81.80   | 0.40  | 0.12 | 3.23  | 1.25E-03 | 0.04727 |
| PIK3R6    | ENSG00000276231 | 395.05  | 0.80  | 0.25 | 3.22  | 1.27E-03 | 0.04759 |



|             |                 |        |       |      |       |          |         |
|-------------|-----------------|--------|-------|------|-------|----------|---------|
| SRGAP2C     | ENSG00000171943 | 90.01  | -0.45 | 0.14 | -3.22 | 1.27E-03 | 0.04759 |
| NA          | ENSG00000238142 | 30.25  | 0.73  | 0.23 | 3.22  | 1.27E-03 | 0.04759 |
| ADORA2A-AS1 | ENSG00000178803 | 106.66 | -0.75 | 0.23 | -3.22 | 1.28E-03 | 0.04759 |
| VAMP1       | ENSG00000139190 | 228.57 | 0.47  | 0.14 | 3.22  | 1.28E-03 | 0.04759 |
| MGAT4B      | ENSG00000161013 | 163.72 | 0.60  | 0.19 | 3.22  | 1.28E-03 | 0.04759 |
| BCL11B      | ENSG00000127152 | 201.30 | -0.76 | 0.24 | -3.22 | 1.29E-03 | 0.04774 |
| AAED1       | ENSG00000158122 | 120.97 | 0.57  | 0.18 | 3.22  | 1.29E-03 | 0.04774 |
| OLIG1       | ENSG00000184221 | 109.22 | 0.80  | 0.25 | 3.21  | 1.31E-03 | 0.04815 |
| RAD18       | ENSG00000070950 | 186.11 | 0.53  | 0.17 | 3.21  | 1.31E-03 | 0.04821 |
| LINC00528   | ENSG00000269220 | 579.39 | -0.69 | 0.21 | -3.21 | 1.32E-03 | 0.04825 |
| GSDMB       | ENSG00000073605 | 172.88 | 0.66  | 0.20 | 3.21  | 1.33E-03 | 0.04844 |
| RTKN2       | ENSG00000182010 | 22.30  | -0.79 | 0.25 | -3.21 | 1.33E-03 | 0.04844 |
| OBSCN       | ENSG00000154358 | 26.72  | -0.78 | 0.24 | -3.20 | 1.36E-03 | 0.04927 |
| PPARA       | ENSG00000186951 | 353.62 | 0.70  | 0.22 | 3.20  | 1.37E-03 | 0.04947 |
| EXT2        | ENSG00000151348 | 210.66 | 0.51  | 0.16 | 3.20  | 1.37E-03 | 0.04947 |
| GFI1B       | ENSG00000165702 | 102.21 | 0.78  | 0.24 | 3.20  | 1.37E-03 | 0.04947 |
| YES1        | ENSG00000176105 | 156.77 | 0.68  | 0.21 | 3.20  | 1.38E-03 | 0.04966 |
| NT5E        | ENSG00000135318 | 22.71  | -0.80 | 0.25 | -3.20 | 1.39E-03 | 0.04988 |
| C1orf162    | ENSG00000143110 | 699.85 | 0.39  | 0.12 | 3.20  | 1.40E-03 | 0.04988 |
| SLC10A7     | ENSG00000120519 | 87.94  | 0.55  | 0.17 | 3.20  | 1.40E-03 | 0.04988 |
| ARID5B      | ENSG00000150347 | 189.93 | -0.60 | 0.19 | -3.19 | 1.40E-03 | 0.04997 |

**Supplemental Figure Legends:**

**Supplemental Figure 1: Plasma tryptase does not correlate with urinary eicosanoids in subjects with AERD on high-dose aspirin.**

**A)** Plasma total tryptase correlation (Pearson) with urinary leukotriene (LT)<sub>4</sub> on high-dose aspirin in subjects with AERD.

**B)** Plasma tryptase correlation (Pearson) with urinary prostaglandin D metabolite (PGD-M) on high-dose aspirin in subjects with AERD.

**C)** Plasma tryptase correlation (Pearson) with urinary prostaglandin E metabolite (PGE-M) on high-dose aspirin in subjects with AERD.

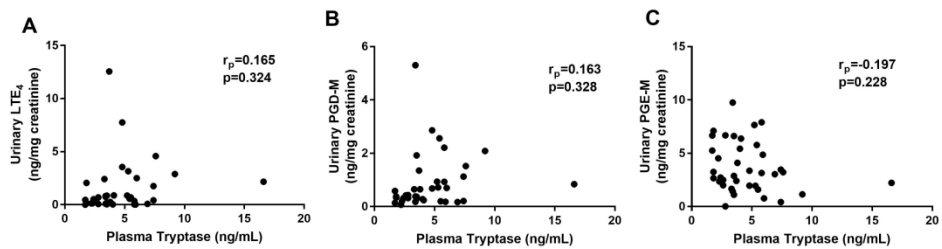

Supplemental Figure 1: Plasma tryptase does not correlate with urinary eicosanoids in subjects with AERD on high-dose aspirin. A) Plasma total tryptase correlation (Pearson) with urinary leukotriene (LT)E<sub>4</sub> on high-dose aspirin in subjects with AERD. B) Plasma tryptase correlation (Pearson) with urinary prostaglandin D metabolite (PGD-M) on high-dose aspirin in subjects with AERD. C) Plasma tryptase correlation (Pearson) with urinary prostaglandin E metabolite (PGE-M) on high-dose aspirin in subjects with AERD.

267x213mm (300 x 300 DPI)
